# Supplementary material
Source: PubMed Central journal article supplement (PMC5362108)
Supplement: NIHMS760480-supplement-S1.pdf [file NIHMS760480-supplement-S1.pdf]

# **Polymer Coatings in 3D Printed Fluidic Device Channels for Improved Cellular Adherence Prior to Electrical Lysis**

Bethany C. Gross, Kari B. Anderson, Jayda E. Meisel,  
Megan I. McNitt, and Dana M. Spence

Department of Chemistry

Michigan State University

East Lansing, MI, 48823

[dspence@chemistry.msu.edu](mailto:dspence@chemistry.msu.edu)

517.355.9715 x174

## Supporting Information Available

Supporting Information Available: This material is available free of charge via the Internet at <http://pubs.acs.org>.

**Figure S1.** Bright field image of endothelial cells displaying characteristic cobblestone patterning within a PDMS-coated 3D printed channel.

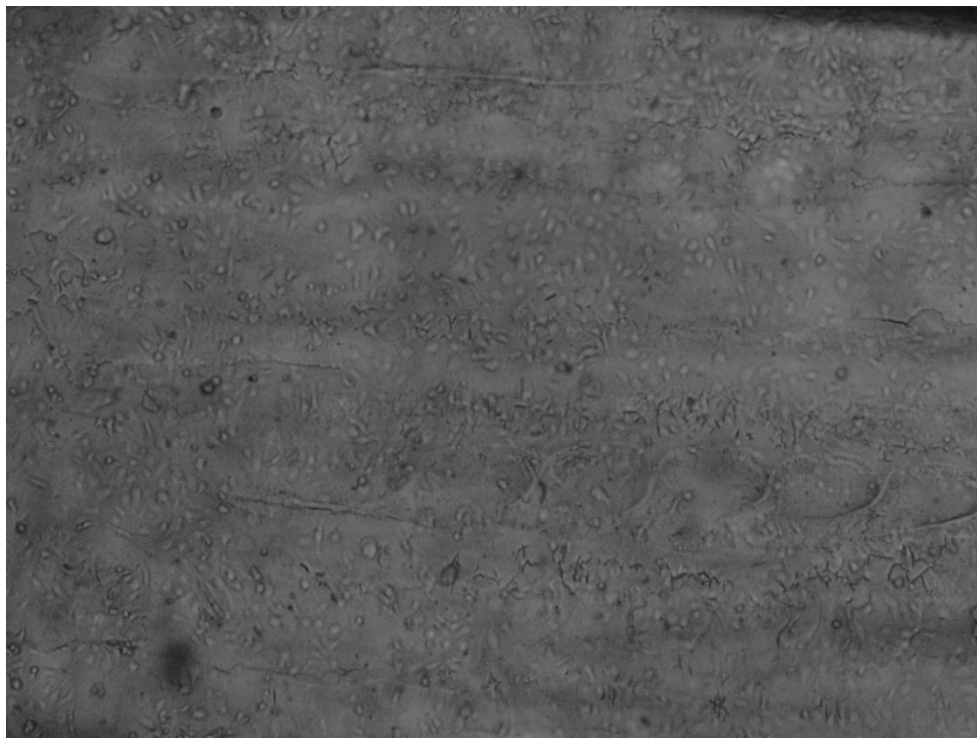

**Figure S2.** Viability of cells on the device when media delivery was static. Propidium iodide (Ex 493/ Em 636 nm) and Syto 9 (Ex 485/ Em 498nm) were used to determine viability.  $n \geq 4$ ; Error = S.E.M. (left). Cell coverage on the device through day 5 (right).

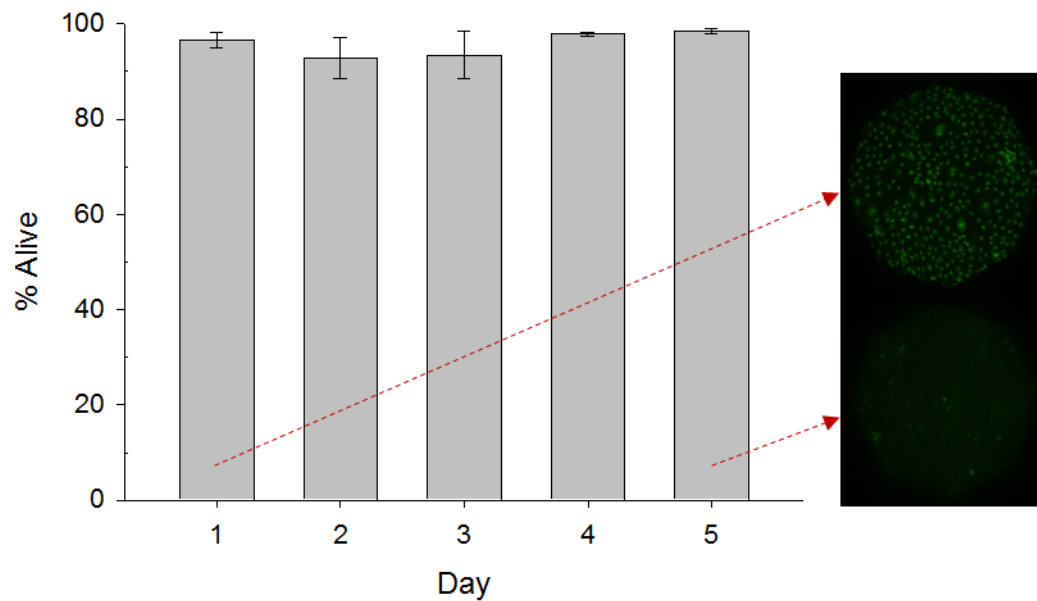

**Video S1.** Lysis of adhered endothelial cells on a channel coated with PDMS within a 3D printed fluidic device when a 100 V potential was applied. Cells visualized with Hoechst 33342. Device 1 geometry shown.

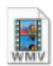

Cell lysis movie march 2.wmv
